# Supplementary material for: Self-assembly of Cu(ii) with amyloid β19–20 peptide: relevant to Alzheimer's disease
Source: Royal Society of Chemistry journal article supplement (doi:10.1039/c4ra02758b), 2014-01-01
Supplement: c4ra02758b1.pdf [file c4ra02758b1.pdf]

## **Electronic Supplementary Information (ESI)**

### **Self-assembly of Cu (II) with Amyloid $\beta_{19-20}$ Peptide: Relevant to Alzheimer's Disease**

**Xiaofang Shen\*, Xiaorong Deng and Yuehong Pang**

State Key Laboratory of Food Science and Technology

School of Food Science and Technology, Jiangnan University

Wuxi, Jiangsu 214122 (P.R. China)

E-mail: [xfshen@jiangnan.edu.cn](mailto:xfshen@jiangnan.edu.cn)

## Experimental Section

**Materials:** A $\beta_{19-20}$  peptide (diphenylalanine, H-Phe-Phe-OH) was purchased from Bachem (Bubendorf, Switzerland). CuCl<sub>2</sub>·2H<sub>2</sub>O, EDTA, Tris were purchased from Sinopharm Chemical Reagent (Shanghai, China). All chemicals and reagents were of analytical grade used as received. Ultrapure water was used in all experiments.

**Methods and characterization:** UV-vis spectroscopies were performed on a Tu-1900 dual beam UV-visible spectrophotometer (Persee, Beijing, China). Fluorescence emission spectra were obtained using a Fluoro Max-4 spectrofluorometer (Horiba Jobin Yvon, New Jersey, USA). Microscopy images were obtained using VHX-1000 super depth of field three-dimensional Microscopy (Keyence, Osaka, Japan). Scanning electron microscopy images of A $\beta_{19-20}$ -Cu(II) complex were obtained using S4800 SEM operating at 1.0 kV (Hitachi Limited, Tokyo, Japan).

Fresh solutions of the 3.2 mM A $\beta_{19-20}$  were prepared by dissolving the lyophilized form in Buffer solution (10 mM Tris-HCl, pH 7.4). To avoid any pre-aggregation, fresh stock solutions were prepared for each experiment. The self-assembly of A $\beta_{19-20}$  tubular structure and Cu(II)-A $\beta_{19-20}$  microvesicles were obtained by placing 3.2 mM A $\beta_{19-20}$  peptide and 1:1 molar ratio of Cu(II) to A $\beta_{19-20}$  solution on glass slide and then keeping them still for 24 h. The same volume of 3.2 mM EDTA was added to Cu(II)-A $\beta_{19-20}$  system to competitively binding Cu(II) from the microvesicles. The experiments were conducted at a constant temperature of 37 °C prior to morphology observation. The fluorescence titration spectra of A $\beta_{19-20}$  with various molar ratio of Cu(II) were collected from 275 to 400 nm with excitation at 265 nm and slit width at 5 nm, respectively. The intrinsic fluorescence quenching experiments of A $\beta_{19-20}$  by Cu(II) were performed at 20, 37 and 47 °C after being incubated for 0.5 h in 10 mM Tris-HCl, pH=7.4.

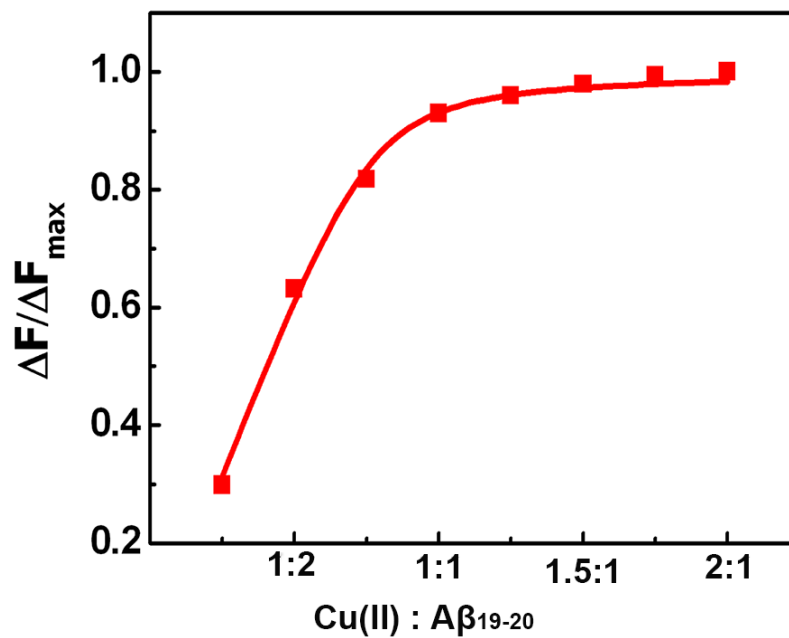

**Figure S1** Nonlinear fitting curve of Aβ<sub>19-20</sub> peptide binding to Cu(II).

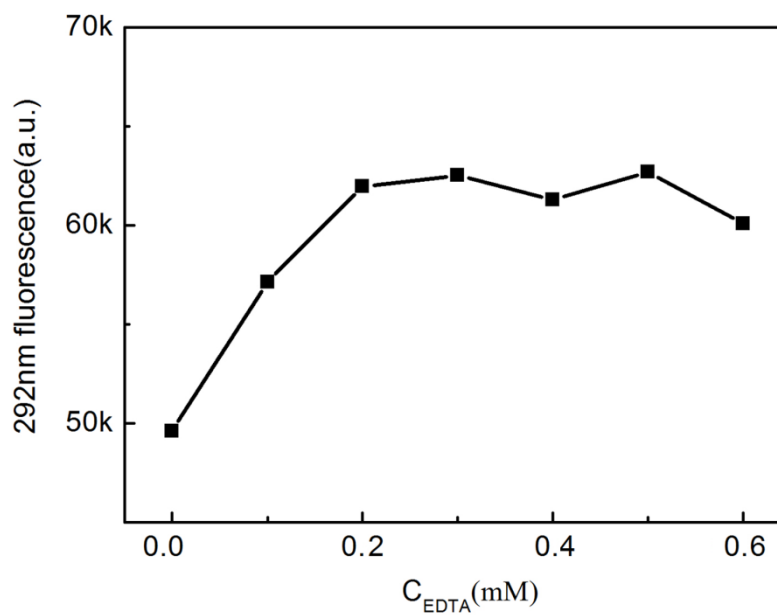

**Figure S2** The effect of chelator EDTA concentration and (B) interaction time.

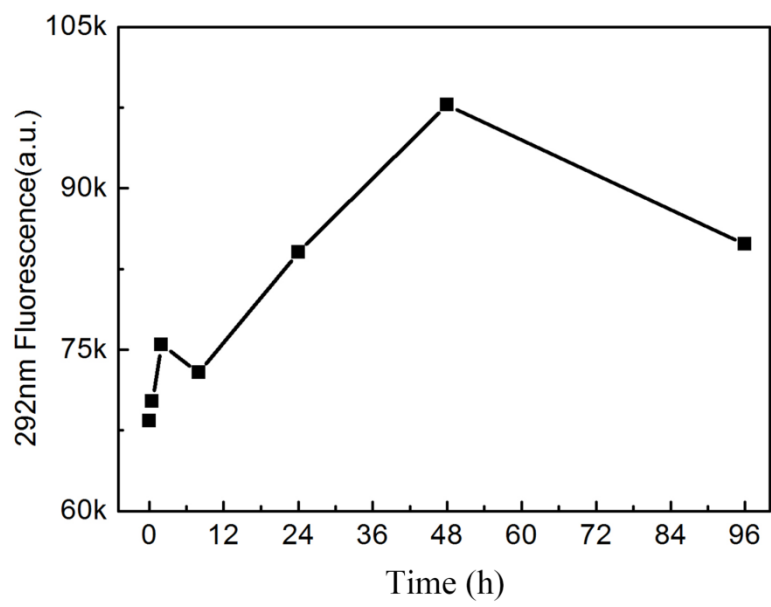

**Figure S3** The effect of chelator EDTA interaction time.
